# Supplementary material for: Design and computational insight into two novel CL-20 analogues, BNMTNIW and BNIMTNIW: high performance energetic materials
Source: Royal Society of Chemistry journal article supplement (doi:10.1039/d2nj02838g), 2022-01-01
Supplement: d2nj02838g1.pdf [file d2nj02838g1.pdf]

## **Electronic Supplementary Information**

# **Design and Computational Insight on Two Novel CL-20 Analogues, BNMTNIW and BNIMTNIW: High Performance Energetic Materials**

Sohan Lal<sup>a</sup>, Haixiang Gao<sup>b</sup>, Jean'ne M. Shreeve<sup>\*a</sup>

<sup>a</sup>Department of Chemistry, University of Idaho, Moscow, Idaho 83844-2343.

<sup>b</sup>Department of Applied Chemistry, China Agricultural University, Beijing, China 100193

\*To whom correspondence should be addressed. E-mail: [jshreeve@uidaho.edu](mailto:jshreeve@uidaho.edu). Fax: +1-208-885-6173.

**New Journal of Chemistry**

| Entry | Table of Contents                                                                                                                                                                       | Page |
|-------|-----------------------------------------------------------------------------------------------------------------------------------------------------------------------------------------|------|
| 1     | <b>Table S1.</b> Calculated Total Energy ( $E_0$ ), Zero-Point Energy (ZPE), values of Thermal Correction ( $H_T$ ) and Enthalpy of Formation ( $\Delta H_f^\circ$ ) of title compounds | S3   |
| 2     | <b>Figure S1.</b> Isodesmic reaction for BNMTNIW, BNIMTNIW and HNIW (CL-20)                                                                                                             | S3   |
| 3     | <b>Table S2.</b> Gas phase enthalpies of formation $\Delta H_f^\circ(g)$ of the title compounds at different level of theories                                                          | S4   |
| 4     | <b>Figure S2.</b> Computed electrostatic potential (ESP) for RDX, HMX, HNIW (CL-20)                                                                                                     | S4   |
| 5     | <b>Figure S3.</b> Mulliken charges and NBO charges on HNIW (CL-20)                                                                                                                      | S5   |
| 6     | <b>Table S3.</b> Total surface area (SA), $\sigma^2_{tot}$ , $\sigma^2_+$ , balance of charges, impact sensitivity ( $h_{50[em]}$ ) and impact energy [ $h_{50[J]}$ ].                  | S5   |
| 7     | <b>Table S4.</b> Plausible decomposition pathways and corresponding bond associated properties                                                                                          | S6   |
| 8     | <b>Figure S4.</b> Computed IR spectrum for HNIW (CL-20)                                                                                                                                 | S7   |
| 9     | <b>Figure S5.</b> Computed Raman spectrum for HNIW (CL-20)                                                                                                                              | S7   |
| 10    | <b>Figure S6.</b> Comparison of bond dissociation energies (BDEs) of (-N-NO <sub>2</sub> ) bond                                                                                         | S8   |
| 11    | <b>Figure S7.</b> Comparison of impact sensitivities (IS) of the title compounds.                                                                                                       | S8   |
| 12    | <b>Table S5.</b> Cartesian coordinates (in Å) for optimized structure of BNMTNIW, <b>1</b>                                                                                              | S9   |
| 13    | <b>Table S6.</b> Cartesian coordinates (in Å) for optimized structure of BNMTNIW, <b>1A</b>                                                                                             | S10  |
| 14    | <b>Table S7.</b> Cartesian coordinates (in Å) for optimized structure of BNMTNIW, <b>1B</b>                                                                                             | S11  |
| 15    | <b>Table S8.</b> Cartesian coordinates (in Å) for optimized structure of BNMTNIW, <b>1C</b>                                                                                             | S13  |
| 16    | <b>Table S9.</b> Mulliken atomic charges and NBO charges for optimized structure of BNMTNIW, <b>1</b>                                                                                   | S14  |
| 17    | <b>Table S10.</b> Cartesian coordinates (in Å) for optimized structure of BNIMTNIW, <b>2</b>                                                                                            | S15  |
| 18    | <b>Table S11.</b> Cartesian coordinates (in Å) for optimized structure of BNIMTNIW, <b>2A</b>                                                                                           | S16  |
| 19    | <b>Table S12.</b> Cartesian coordinates (in Å) for optimized structure of BNIMTNIW, <b>2B</b>                                                                                           | S18  |
| 20    | <b>Table S13.</b> Cartesian coordinates (in Å) for optimized structure of BNIMTNIW, <b>2C</b>                                                                                           | S19  |
| 21    | <b>Table S14.</b> Mulliken atomic charges and NBO charges for optimized structure of BNIMTNIW, <b>2</b>                                                                                 | S20  |
| 22    | <b>Table S15.</b> Comparison of selected bond lengths for optimized structure of BNMTNIW, <b>1</b> and BNIMTNIW, <b>2</b>                                                               | S21  |
| 23    | <b>Table S16.</b> Comparison of selected bond angles for optimized structure of BNMTNIW, <b>1</b>                                                                                       | S23  |
| 24    | <b>Table S17.</b> Comparison of selected bond angles for optimized structure of BNIMTNIW, <b>2</b>                                                                                      | S25  |

**Table S1.** Calculated Total Energy ( $E_0$ ), Zero-point Energy (ZPE), values of Thermal Correction ( $H_T$ ) and Enthalpy of Formation ( $\Delta H_f^\circ$  (g)) of the compounds using B3LYP/6-31+G\*\*//MP2/6-311++G\*\* level of theory (Isodesmic)

| Compounds                                         | $E_0$ [Hartree/Particle] | ZPE [Hartree/Particle] | $H_T$ [Hartree/Particle] | $\Delta H_f^\circ$ (g) kJ/mol |
|---------------------------------------------------|--------------------------|------------------------|--------------------------|-------------------------------|
| BNMTNIW, <b>1</b>                                 | -1865.8611257            | 0.277524               | 0.027101                 | 731.52                        |
| BNIMTNIW, <b>2</b>                                | -2015.9359751            | 0.285933               | 0.028927                 | 605.56                        |
| HNIW (CL-20)                                      | -1787.4213305            | 0.219373               | 0.023319                 | 764.70                        |
| CH <sub>4</sub>                                   | -40.3796224              | 0.044793               | 0.003812                 | -74.60 <sup>a</sup>           |
| NH <sub>3</sub>                                   | -56.43462                | 0.034377               | 0.003818                 | -45.9 <sup>a</sup>            |
| CH <sub>3</sub> NO <sub>2</sub>                   | -244.4784821             | 0.049840               | 0.005298                 | -74.30 <sup>a</sup>           |
| CH <sub>3</sub> ONO <sub>2</sub>                  | -319.509055              | 0.054251               | 0.005933                 | -137.28 <sup>b</sup>          |
| CH <sub>3</sub> -NH-CH <sub>3</sub>               | -134.7787236             | 0.092336               | 0.005347                 | -19.54 <sup>b</sup>           |
| CH <sub>3</sub> -CH <sub>3</sub>                  | -79.5716305              | 0.07461                | 0.004428                 | -84.00 <sup>b</sup>           |
| NH <sub>2</sub> -NO <sub>2</sub>                  | -260.4931748             | 0.039257               | 0.004652                 | -6.11 <sup>b</sup>            |
| CH <sub>3</sub> -CH <sub>2</sub> -CH <sub>3</sub> | -118.7673365             | 0.10328                | 0.005485                 | -103.80 <sup>b</sup>          |
| CH <sub>3</sub> -NH <sub>2</sub>                  | -95.5938424              | 0.064026               | 0.004375                 | -23.00 <sup>a</sup>           |

[a] Data are from Ref. [ D. R. Lide ed., CRC Handbook of Chemistry and Physics, 88<sup>th</sup> Edition (Internet Version **2008**), CRC Press/Taylor and Francis, Boca Raton, FL.]. <sup>b</sup>Obtained at G2 level.

The oxygen balance for C<sub>a</sub>H<sub>b</sub>N<sub>c</sub>O<sub>d</sub> was calculated by using equation 1.

$$OB^{CO_2}(\%) = -1600(2a-0.5b-d)/MW \quad (1)$$

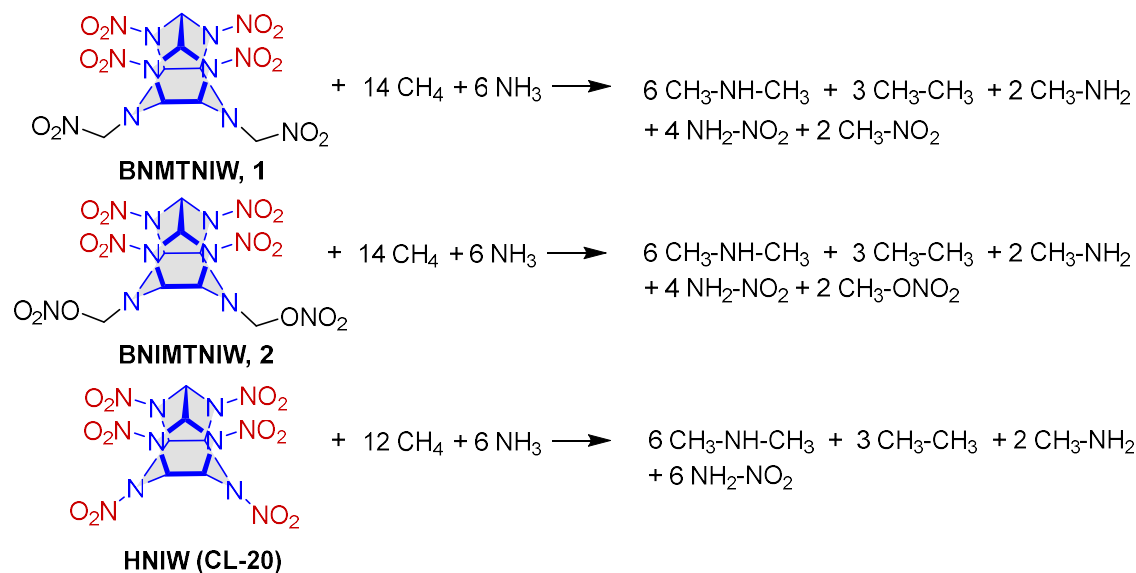

**Figure S1.** Isodesmic reactions for BNMTNIW, **1** and BNIMTNIW, **2** and HNIW (CL-20).

The gas phase enthalpies of formation  $\Delta H_f^\circ$ (g) were predicted according to the isodesmic equation as shown in Figure S1.

**For compound 1**

$$\Delta H_f^\circ(g)_{\text{BNMTNIW}} = 6\Delta H_f^\circ(g)_{\text{CH}_3\text{-NH-CH}_3} + 3\Delta H_f^\circ(g)_{\text{CH}_3\text{-CH}_3} + 2\Delta H_f^\circ(g)_{\text{CH}_3\text{-NH}_2} + 4\Delta H_f^\circ(g)_{\text{NH}_2\text{-NO}_2} - 2\Delta H_f^\circ(g)_{\text{CH}_3\text{NO}_2} - 14\Delta H_f^\circ(g)_{\text{CH}_4} - 6\Delta H_f^\circ(g)_{\text{NH}_3} \quad (2)$$

### For compound 2

$$\Delta H_f^\circ(g)_{\text{BNIMTNIW}} = 6\Delta H_f^\circ(g)_{\text{CH}_3\text{-NH-CH}_3} + 3\Delta H_f^\circ(g)_{\text{CH}_3\text{-CH}_3} + 2\Delta H_f^\circ(g)_{\text{CH}_3\text{-NH}_2} + 4\Delta H_f^\circ(g)_{\text{NH}_2\text{-NO}_2} - 2\Delta H_f^\circ(g)_{\text{CH}_3\text{ONO}_2} - 14\Delta H_f^\circ(g)_{\text{CH}_4} - 6\Delta H_f^\circ(g)_{\text{NH}_3} \quad (3)$$

**Table S2.** Gas phase enthalpies of formation  $\Delta H_f^\circ(g)$  of the title compounds at different level of theory<sup>a</sup>

| Method | Compounds   | E <sub>0</sub> [Hartree/Particle] | ZPE[Hartree/Particle] | $\Delta H_f^\circ$ (g) kJ/mol |
|--------|-------------|-----------------------------------|-----------------------|-------------------------------|
| A      | HNIW(CL-20) | -1791.465605                      | 0.218974              | 517.61                        |
| A      | RDX         | -897.516473                       | 0.141466              | 161.32                        |
| A      | HMX         | -1196.696388                      | 0.190270              | 194.73                        |
| A      | BNMTNIW, 1  | -1870.097564                      | 0.276808              | 368.55                        |
| B      | BNMTNIW, 1  | -1870.046386                      | 0.277589              | 527.21                        |
| A      | BNIMTNIW, 2 | -2020.497774                      | 0.285121              | 247.35                        |
| B      | BNIMTNIW, 2 | -2020.444159                      | 0.285985              | 412.42                        |

<sup>a</sup>Calculated using Gaussian 03 program<sup>1</sup> (atomization method). A= B3LYP/6-311++G (d,p). B = B3LYP/6-311G (d,p).

Subsequently, their solid phase enthalpies of formation  $\Delta H_f^\circ$  (s) were calculated by using equations 4-5.<sup>2-4</sup>

$$\Delta H_f^\circ(s) = \Delta H_f^\circ(g) - \Delta H_{\text{sub}} \quad (4)$$

Where,  $\Delta H_f^\circ(s)$  is solid phase enthalpy of formation,  $\Delta H_f^\circ(g)$  is enthalpy of formation in gas phase and  $\Delta H_{\text{sub}}$  is represent the enthalpy of sublimation.

$$\Delta H_{\text{sub}} = a(\text{SA})^2 + b\sqrt{(\sigma^2_{\text{tot}}v)} + c \quad (5)$$

Where,  $a$ ,  $b$  and  $c$  are fitting parameters, SA is the surface area of the 0.001 electron bohr<sup>-3</sup> isosurface of the electrostatic potential of the molecules,  $\sigma^2_{\text{tot}}$  is the measure of variability of electronic potential on the surface, and  $v$  is the degree of balance between the positive and negative charges on the isosurface.

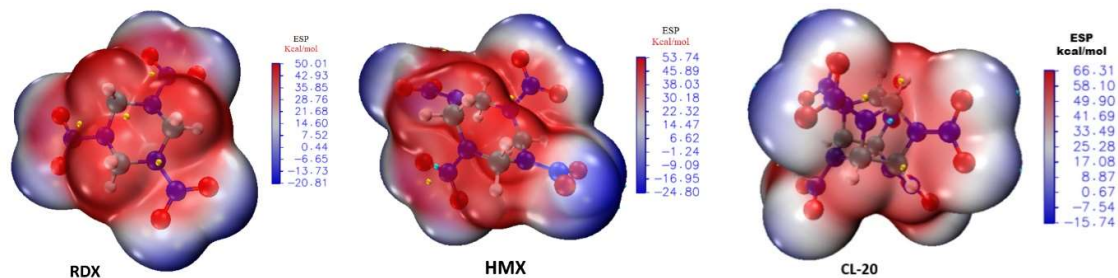

**Figure S2.** Computed electrostatic potential (ESP) maps of (a) RDX, (b) HMX and (c) HNIW (CL-20). Color ranges in kcal/mol: Red, more positive; Blue, more negative and Greyer, in between positive and negative.

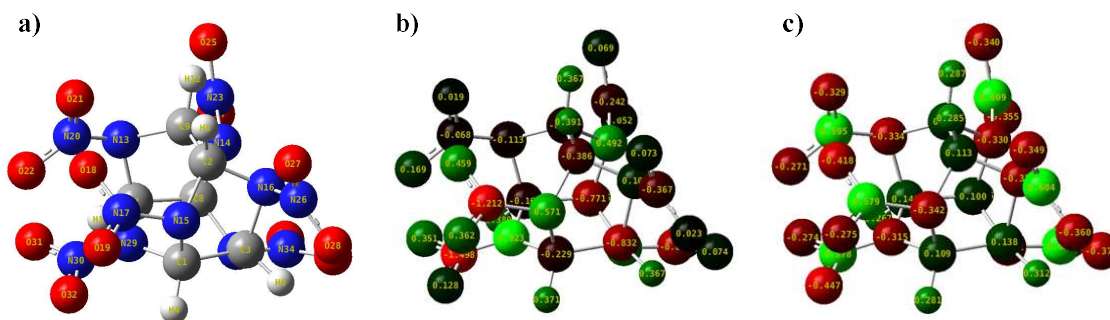

**Figure S3:** (a) HNIW (CL-20) optimized structure with atom numbering (b) Mulliken charges and (c) NBO charges

### Impact sensitivity

The impact sensitivity ( $h_{50}$ ) of the title compounds were predicted by using equation 6.<sup>5</sup>

$$h_{50} [\text{cm}] = \alpha\sigma^2_+ + \beta v + \gamma \quad (6)$$

Where, the coefficients  $\alpha$ ,  $\beta$ ,  $\gamma$  are -0.0064, 241.42 and -3.43, respectively. The  $\sigma^2_+$  is the measure of variability of the positive surface potentials and  $v$  is the degree of balance between the positive and negative charges on the isosurface.

Then their corresponding impact energies were calculated by using 2.5 kg hammer weight.

**Table S3.** Total surface area (SA),  $\sigma^2_{\text{tot}}$ ,  $\sigma^2_+$ , balance of charges, impact sensitivity ( $h_{50[\text{cm}]}$ ) and impact energy [ $h_{50[\text{J}]}$ ].

| #           | SA <sup>a</sup><br>Å <sup>2</sup> | $\sigma^2_{\text{tot}}$ <sup>b</sup><br>(kcal/mol) <sup>2</sup> | $\sigma^2_+$ <sup>c</sup><br>(kcal/mol) <sup>2</sup> | $v$ <sup>d</sup> | $h_{50}$ <sup>e</sup><br>[cm] | $h_{50}$ <sup>f</sup><br>[J] |
|-------------|-----------------------------------|-----------------------------------------------------------------|------------------------------------------------------|------------------|-------------------------------|------------------------------|
| HNIW(CL-20) | 324.62                            | 239.42                                                          | 224.49                                               | 0.05844748       | 9.25                          | 2.27                         |
| RDX         | 209.49                            | 214.34                                                          | 182.25                                               | 0.12731604       | 26.14                         | 6.41                         |
| HMX         | 251.50                            | 246.97                                                          | 207.61                                               | 0.13397103       | 27.58                         | 6.76                         |
| <b>1</b>    | 357.83                            | 288.47                                                          | 256.36                                               | 0.09892218       | 18.81                         | 4.61                         |
| <b>2</b>    | 375.20                            | 248.91                                                          | 218.68                                               | 0.10670471       | 20.93                         | 5.13                         |

<sup>a</sup>SA = Total surface area. <sup>b</sup>Overall variance ( $\sigma^2_{\text{tot}}$ ). <sup>c</sup>Positive variance ( $\sigma^2_+$ ). <sup>d</sup>Balance of charges ( $v$ ). <sup>e</sup> $h_{50}$  [cm] = Height from where 50% probability of the dropped materials resulted in an explosion. <sup>f</sup> $h_{50}$  [J] = Predicted impact sensitivities using 2.5 kg weight of a drop-hammer.

The standard enthalpies of combustion  $\Delta H_{f(\text{combust})}$  for the title compounds was calculated by following equation

$$\Delta H_{f(\text{combust})} = \sum \Delta H_{f(\text{products})} - \sum \Delta H_{f(\text{reactants})} \quad (6)$$

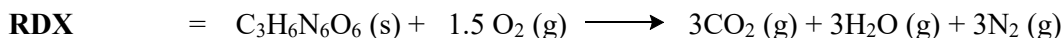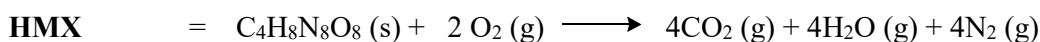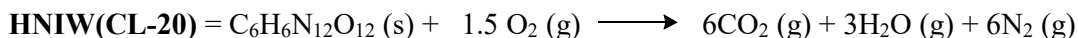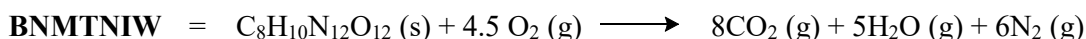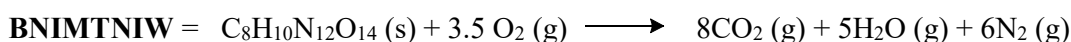

The standard enthalpy of formation for  $\text{CO}_2$  ( $\Delta H_{f(\text{CO}_2)} = -393.51 \text{ kJmol}^{-1}$ );  $\text{H}_2\text{O}$  ( $\Delta H_{f(\text{H}_2\text{O})} = -243.015 \text{ kJmol}^{-1}$ ).

**Table S4.** Plausible decomposition pathways and corresponding bond associated properties<sup>a</sup>

| #  | Plausible Decomposition Pathways                                                                                      | BL <sup>b</sup> | BL <sup>b</sup> | BO <sup>c</sup> | BO <sup>c</sup> | $\Delta H_{f^{\circ}}(\text{g})^{\text{d}}$ | BDE <sup>c</sup> |
|----|-----------------------------------------------------------------------------------------------------------------------|-----------------|-----------------|-----------------|-----------------|---------------------------------------------|------------------|
| 1A | 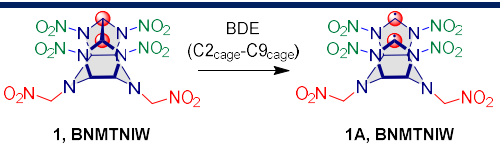 <p>1, BNMTNIW → 1A, BNMTNIW</p>    | 1.6034          | ---             | 0.9543          | ---             | 645.52                                      | 276.96           |
| 1B |  <p>1, BNMTNIW → 1B, BNMTNIW</p>   | ---             | 1.3857          | ---             | 0.9531          | 507.23                                      | 142.67           |
| 1C |  <p>1, BNMTNIW → 1C, BNMTNIW</p>   | ---             | 1.5677          | ---             | 0.8829          | 565.87                                      | 201.30           |
| 2A |  <p>2, BNIMTNIW → 2A, BNIMTNIW</p> | 1.5968          | ---             | 0.9634          | ---             | 508.99                                      | 261.65           |
| 2B |  <p>2, BNIMTNIW → 2B, BNIMTNIW</p> | ---             | 1.4435          | ---             | 0.9755          | 378.93                                      | 135.55           |

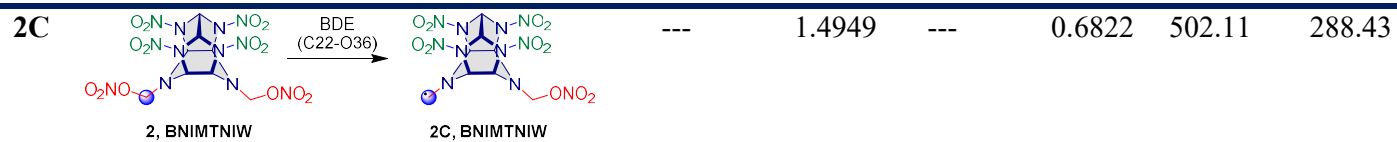

<sup>a</sup>Method: B3LYP/6-311++G (d,p). <sup>b</sup>Bond length (LB) in Å. <sup>c</sup>Wiberg bond order (BO).

<sup>d</sup>Enthalpy of formation  $\Delta H_f^\circ(\text{g})$  in kJ/mol, <sup>e</sup>Bond dissociation energy (BDE) in kJ/mol.

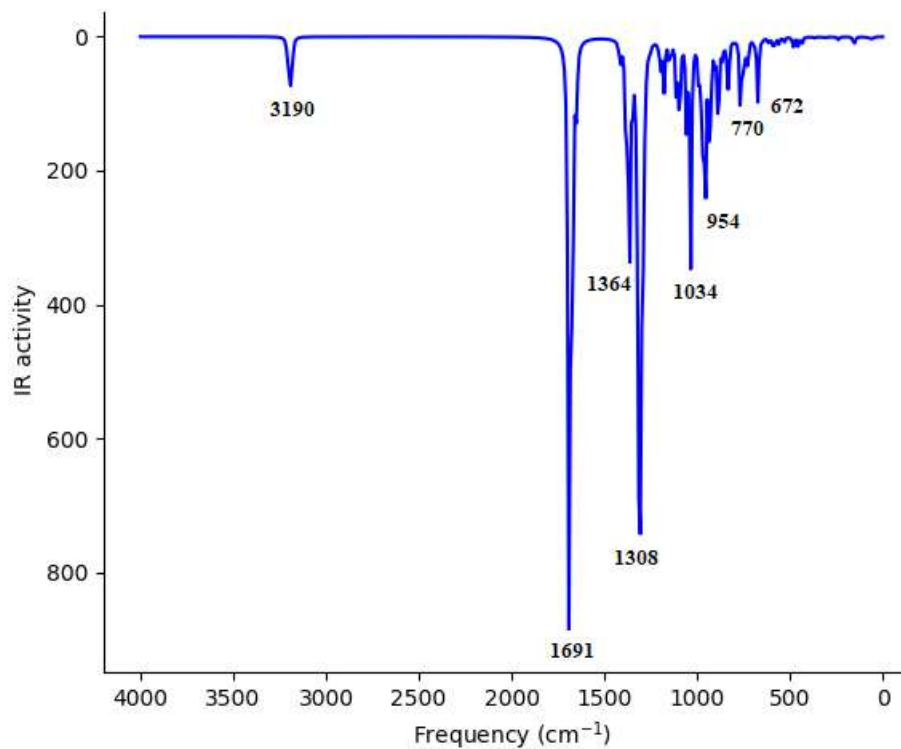

**Figure S4.** Computed IR spectrum for HNIW (CL-20)

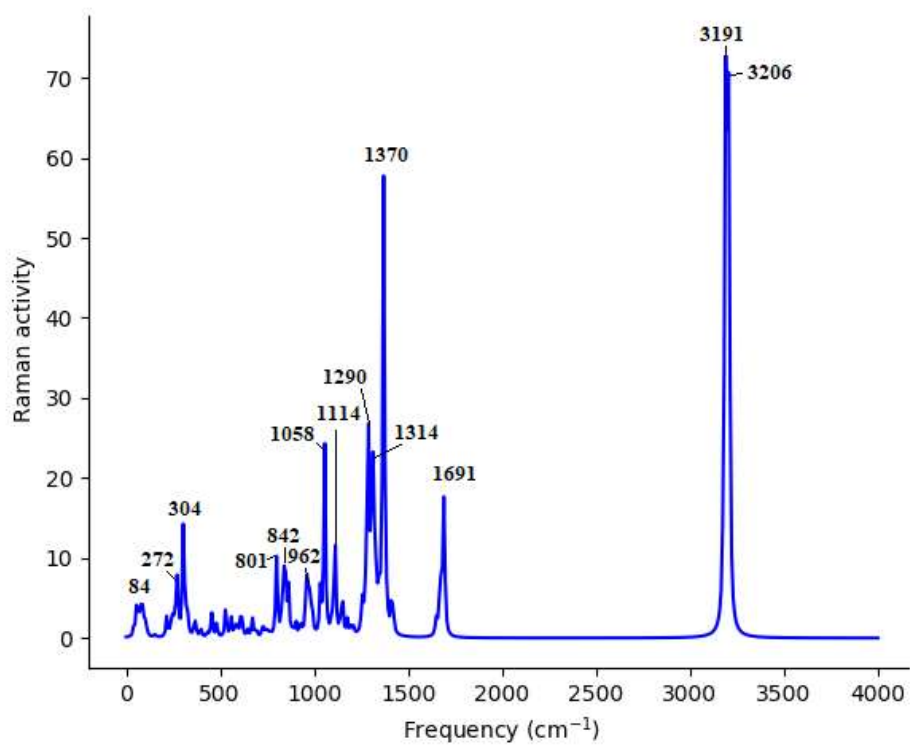

**Figure S5.** Computed Raman spectrum for HNIW (CL-20)

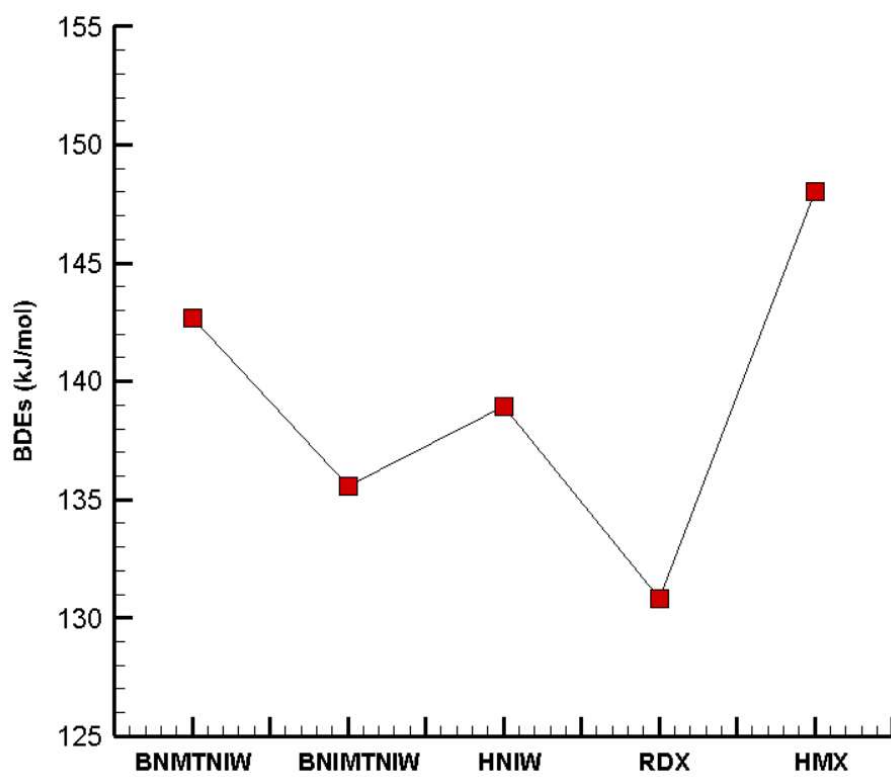

**Figure S6.** Comparison of bond dissociation energies (BDEs) of (-N-NO<sub>2</sub>) bond.



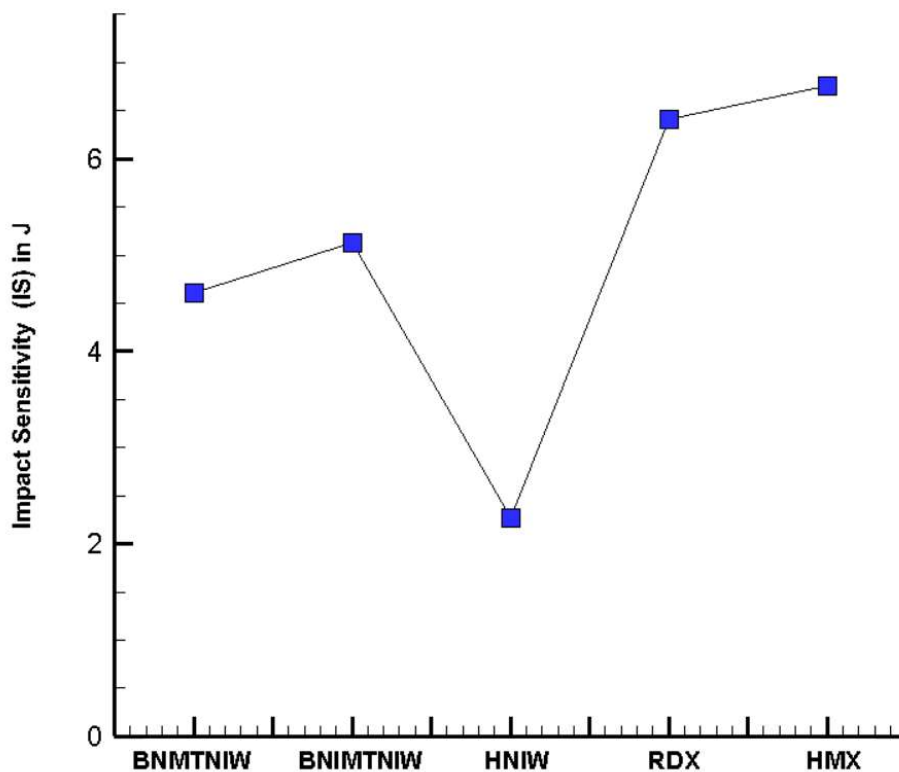

**Figure S7.** Comparison of impact sensitivities (IS) of the title compounds.

**Table S5.** Cartesian coordinates (in Å) for optimized structure of **BNMTNIW**, **1** obtained using the B3LYP/6-311++G(d,p) level of theory

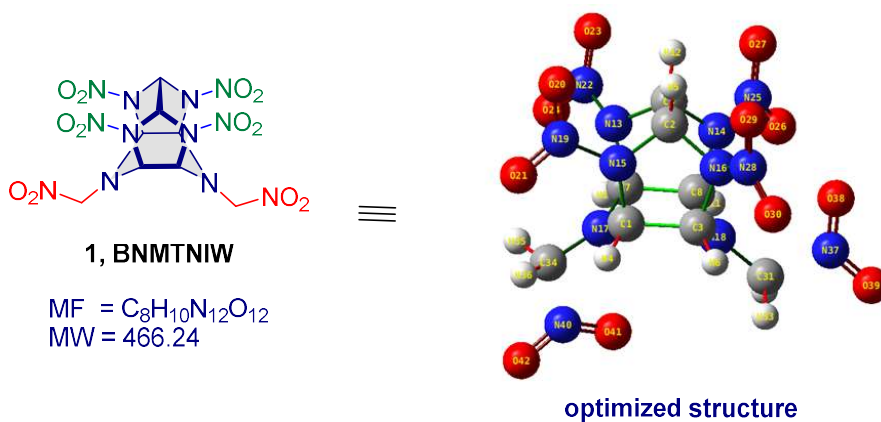

| Center Number | Atomic Symbol | Coordinates (Angstroms) |          |           |
|---------------|---------------|-------------------------|----------|-----------|
|               |               | X                       | Y        | Z         |
| 1             | C             | -4.135091               | 0.374433 | -1.845399 |
| 2             | C             | -2.158328               | 1.758166 | -1.773883 |
| 3             | C             | -3.336372               | 0.131014 | -0.492605 |
| 4             | H             | -5.196919               | 0.513028 | -1.659607 |
| 5             | H             | -1.806462               | 2.783415 | -1.773667 |
| 6             | H             | -3.992811               | 0.187884 | 0.370359  |

|    |   |           |           |           |
|----|---|-----------|-----------|-----------|
| 7  | C | -2.563125 | -1.031901 | -3.015380 |
| 8  | C | -1.786784 | -1.301939 | -1.654404 |
| 9  | C | -1.124882 | 0.804771  | -2.544597 |
| 10 | H | -2.488592 | -1.884875 | -3.681911 |
| 11 | H | -1.341651 | -2.292622 | -1.641842 |
| 12 | H | -0.273219 | 1.366058  | -2.913459 |
| 13 | N | -1.846073 | 0.123368  | -3.622231 |
| 14 | N | -0.719524 | -0.285956 | -1.671093 |
| 15 | N | -3.530704 | 1.655084  | -2.288239 |
| 16 | N | -2.371467 | 1.264065  | -0.425668 |
| 17 | N | -3.935386 | -0.708492 | -2.764168 |
| 18 | N | -2.680604 | -1.141833 | -0.539100 |
| 19 | N | -3.861629 | 2.186883  | -3.524342 |
| 20 | O | -3.074397 | 2.981900  | -4.006377 |
| 21 | O | -4.935362 | 1.833639  | -3.991263 |
| 22 | N | -1.151766 | -0.099509 | -4.845218 |
| 23 | O | -0.245713 | 0.662109  | -5.105236 |
| 24 | O | -1.584142 | -1.000640 | -5.542602 |
| 25 | N | 0.629083  | -0.671816 | -1.609333 |
| 26 | O | 0.844648  | -1.810674 | -1.231627 |
| 27 | O | 1.449568  | 0.179510  | -1.892157 |
| 28 | N | -2.568572 | 2.231669  | 0.592740  |
| 29 | O | -2.057067 | 3.319082  | 0.417545  |
| 30 | O | -3.184131 | 1.857514  | 1.574235  |
| 31 | C | -2.621973 | -1.991237 | 0.584331  |
| 32 | H | -2.401610 | -3.019811 | 0.302304  |
| 33 | H | -3.546644 | -1.970431 | 1.159704  |
| 34 | C | -4.980565 | -1.240090 | -3.543399 |
| 35 | H | -4.682661 | -1.475678 | -4.566039 |
| 36 | H | -5.856060 | -0.596863 | -3.567291 |
| 37 | N | -1.522015 | -1.651851 | 1.645488  |
| 38 | O | -0.793838 | -0.700361 | 1.444143  |
| 39 | O | -1.501051 | -2.398018 | 2.606790  |
| 40 | N | -5.505055 | -2.612470 | -2.996561 |
| 41 | O | -4.822907 | -3.207947 | -2.180413 |
| 42 | O | -6.558621 | -2.990451 | -3.470990 |

---

E = -1870.097564 Hartree/particle; ZPE = 0.276808 Hartree/particle.

Number of imaginary frequencies at the B3LYP/6-311++G(d,p) level = 0

**Table S6.** Cartesian coordinates (in Å) for optimized structure of **BNMTNIW**, **1A** obtained using the B3LYP/6-311++G(d,p) level of theory

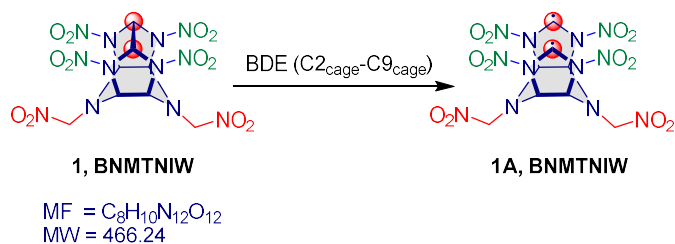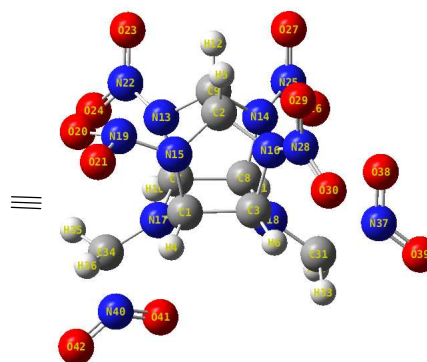

optimized structure

| Center Number | Atomic Symbol | Coordinates (Angstroms) |             |             |
|---------------|---------------|-------------------------|-------------|-------------|
|               |               | X                       | Y           | Z           |
| 1             | C             | -3.62640388             | 0.09905176  | -1.19632583 |
| 2             | C             | -2.07393534             | 1.59958997  | -1.92981467 |
| 3             | C             | -2.57694263             | 0.28560700  | -0.08639654 |
| 4             | H             | -4.59629222             | -0.14750014 | -0.81760593 |
| 5             | H             | -1.98375912             | 2.52622029  | -2.45718973 |
| 6             | H             | -2.98320356             | 0.52423614  | 0.87428456  |
| 7             | C             | -2.01012785             | -1.31708301 | -2.53077214 |
| 8             | C             | -1.06815204             | -1.24095903 | -1.30240913 |
| 9             | C             | -0.95786477             | 0.70562507  | -2.52932039 |
| 10            | H             | -2.13982850             | -2.30066366 | -2.93157986 |
| 13            | H             | -0.42201797             | -2.09002024 | -1.22175030 |
| 12            | H             | -0.25675223             | 1.41032399  | -2.92522533 |
| 13            | N             | -1.39922732             | -0.33217021 | -3.49841925 |
| 14            | N             | -0.25388273             | -0.13129664 | -1.58811697 |
| 15            | N             | -3.54289443             | 1.28822707  | -1.90477946 |
| 16            | N             | -1.82114238             | 1.57450313  | -0.51293459 |
| 17            | N             | -3.31699424             | -0.97677548 | -2.07848182 |
| 18            | N             | -1.82342615             | -1.03383973 | -0.02122851 |
| 19            | N             | -4.11824496             | 1.16637034  | -3.17526075 |
| 20            | O             | -3.43136612             | 0.78538988  | -4.13166292 |
| 21            | O             | -5.31373363             | 1.43962956  | -3.34196406 |
| 22            | N             | -2.26021334             | 0.10787615  | -4.51087284 |
| 23            | O             | -2.15480264             | 1.25766358  | -4.95644124 |
| 24            | O             | -3.12673564             | -0.65291030 | -4.96031344 |
| 25            | N             | 0.87573242              | -0.58432887 | -2.28002114 |
| 26            | O             | 1.33967365              | -1.70630077 | -2.04003919 |
| 27            | O             | 1.41037095              | 0.13716251  | -3.13164638 |
| 28            | N             | -2.45369263             | 2.69212678  | 0.04455762  |
| 29            | O             | -2.50340732             | 3.75467960  | -0.58802733 |
| 30            | O             | -2.96315229             | 2.61755330  | 1.16996572  |
| 31            | C             | -2.76264063             | -2.14126964 | 0.20762766  |
| 32            | H             | -2.22145904             | -3.06282211 | 0.26019689  |
| 33            | H             | -3.46500685             | -2.18559107 | -0.59836073 |
| 34            | C             | -4.18263498             | -0.84060852 | -3.25874647 |
| 35            | H             | -3.58531675             | -0.88015034 | -4.14562152 |
| 36            | H             | -4.69769999             | 0.09634099  | -3.21710935 |

|    |   |             |             |             |
|----|---|-------------|-------------|-------------|
| 37 | N | -3.48041451 | -1.92175131 | 1.47155502  |
| 38 | O | -4.54535359 | -1.29125214 | 1.47697025  |
| 39 | O | -3.01977257 | -2.36743681 | 2.53024628  |
| 40 | N | -5.16127781 | -1.93732876 | -3.27779641 |
| 41 | O | -4.89090545 | -2.99797418 | -3.85536355 |
| 42 | O | -6.25557417 | -1.80001739 | -2.71626742 |

E = -1869.992074 Hartree/particle; ZPE = 0.272659 Hartree/particle

Number of imaginary frequencies at the B3LYP/6-311++G(d,p) level = 0

**Table S7.** Cartesian coordinates (in Å) for optimized structure of **BNMTNIW**, **1B** obtained using the B3LYP/6-311++G(d,p) level of theory

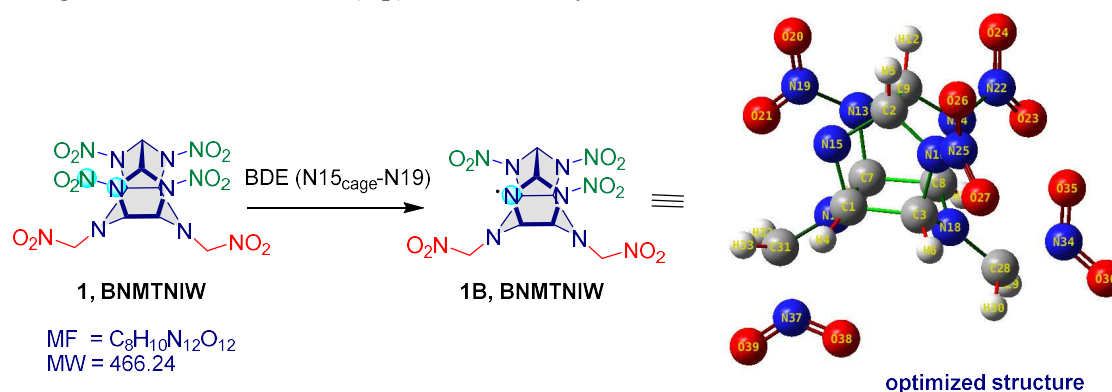

| Center Number | Atomic Symbol | Coordinates (Angstroms) |           |           |
|---------------|---------------|-------------------------|-----------|-----------|
|               |               | X                       | Y         | Z         |
| 1             | C             | -3.928646               | 0.426020  | -1.988685 |
| 2             | C             | -2.017667               | 1.729274  | -1.825089 |
| 3             | C             | -3.292142               | 0.158406  | -0.571563 |
| 4             | H             | -4.998010               | 0.615561  | -1.904054 |
| 5             | H             | -1.645117               | 2.750146  | -1.814254 |
| 6             | H             | -4.020900               | 0.226872  | 0.230201  |
| 7             | C             | -2.336080               | -1.101501 | -3.006420 |
| 8             | C             | -1.668705               | -1.316250 | -1.580310 |
| 9             | C             | -0.907745               | 0.754856  | -2.472546 |
| 10            | H             | -2.277564               | -2.005277 | -3.607308 |
| 11            | H             | -1.219094               | -2.301399 | -1.501602 |
| 12            | H             | -0.031957               | 1.314997  | -2.777400 |
| 13            | N             | -1.442482               | -0.063835 | -3.569655 |
| 14            | N             | -0.583043               | -0.297851 | -1.531181 |
| 15            | N             | -3.261166               | 1.608332  | -2.556037 |
| 16            | N             | -2.336890               | 1.278421  | -0.466252 |
| 17            | N             | -3.706448               | -0.691096 | -2.881274 |
| 18            | N             | -2.639547               | -1.125832 | -0.544062 |
| 19            | N             | -1.722180               | 0.502314  | -4.805416 |
| 20            | O             | -1.216070               | 1.583888  | -5.038770 |
| 21            | O             | -2.414747               | -0.168712 | -5.558431 |
| 22            | N             | 0.755528                | -0.757660 | -1.500418 |

|    |   |           |           |           |
|----|---|-----------|-----------|-----------|
| 23 | O | 0.923800  | -1.889990 | -1.084641 |
| 24 | O | 1.612275  | 0.035791  | -1.835656 |
| 25 | N | -2.501870 | 2.233564  | 0.547057  |
| 26 | O | -1.911685 | 3.288922  | 0.403923  |
| 27 | O | -3.182854 | 1.898429  | 1.502591  |
| 28 | C | -2.668505 | -1.944311 | 0.602230  |
| 29 | H | -2.436280 | -2.982369 | 0.367324  |
| 30 | H | -3.632699 | -1.900261 | 1.106584  |
| 31 | C | -4.706976 | -1.144640 | -3.760534 |
| 32 | H | -4.302926 | -1.626497 | -4.646951 |
| 33 | H | -5.403590 | -0.365117 | -4.068925 |
| 34 | N | -1.644601 | -1.589141 | 1.734219  |
| 35 | O | -0.877049 | -0.664528 | 1.557448  |
| 36 | O | -1.714877 | -2.302308 | 2.718696  |
| 37 | N | -5.639763 | -2.228126 | -3.110937 |
| 38 | O | -5.505208 | -2.481084 | -1.927244 |
| 39 | O | -6.453648 | -2.721271 | -3.868230 |

E = -1664.915198 Hartree/particle; ZPE = 0.261587 Hartree/particle

Number of imaginary frequencies at the B3LYP/6-311++G(d,p) level = 0

**Table S8.** Cartesian coordinates (in Å) for optimized structure of **BNMTNIW**, **1C** obtained using the B3LYP/6-311++G(d,p) level of theory

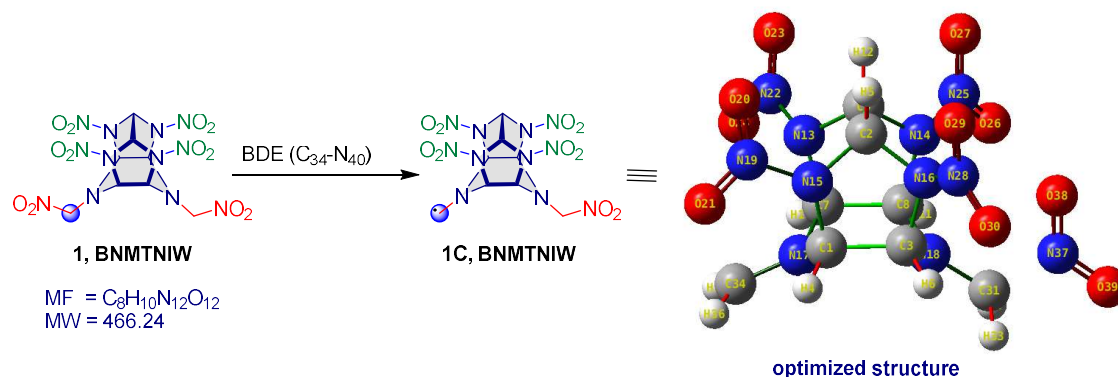

| Center Number | Atomic Symbol | Coordinates (Angstroms) |          |           |
|---------------|---------------|-------------------------|----------|-----------|
|               |               | X                       | Y        | Z         |
| 1             | C             | -4.170241               | 0.264499 | -1.839852 |
| 2             | C             | -2.224367               | 1.688760 | -1.809704 |

|    |   |           |           |           |
|----|---|-----------|-----------|-----------|
| 3  | C | -3.365988 | 0.071600  | -0.484163 |
| 4  | H | -5.236437 | 0.384394  | -1.666330 |
| 5  | H | -1.893249 | 2.720540  | -1.835688 |
| 6  | H | -4.023732 | 0.139472  | 0.377019  |
| 7  | C | -2.569034 | -1.142156 | -2.965140 |
| 8  | C | -1.783308 | -1.357127 | -1.607194 |
| 9  | C | -1.175897 | 0.740294  | -2.559428 |
| 10 | H | -2.483986 | -2.006725 | -3.616669 |
| 11 | H | -1.311357 | -2.335175 | -1.567782 |
| 12 | H | -0.337659 | 1.309345  | -2.946165 |
| 13 | N | -1.882486 | 0.012061  | -3.616461 |
| 14 | N | -0.743138 | -0.318651 | -1.657938 |
| 15 | N | -3.591330 | 1.546553  | -2.307390 |
| 16 | N | -2.419524 | 1.219890  | -0.446801 |
| 17 | N | -3.954360 | -0.859979 | -2.712265 |
| 18 | N | -2.682560 | -1.193167 | -0.491225 |
| 19 | N | -3.998542 | 2.160282  | -3.481116 |
| 20 | O | -3.203163 | 2.933510  | -3.990610 |
| 21 | O | -5.129243 | 1.905617  | -3.858944 |
| 22 | N | -1.145406 | -0.252161 | -4.812957 |
| 23 | O | -0.277767 | 0.544131  | -5.102040 |
| 24 | O | -1.503973 | -1.219459 | -5.458526 |
| 25 | N | 0.609981  | -0.655228 | -1.546655 |
| 26 | O | 0.852174  | -1.771360 | -1.115710 |
| 27 | O | 1.411894  | 0.208188  | -1.846656 |
| 28 | N | -2.619234 | 2.199406  | 0.554228  |
| 29 | O | -2.129862 | 3.293197  | 0.354456  |
| 30 | O | -3.214934 | 1.832108  | 1.551928  |
| 31 | C | -2.544694 | -1.961936 | 0.683949  |
| 32 | H | -2.275429 | -2.993534 | 0.460368  |
| 33 | H | -3.454128 | -1.949505 | 1.283811  |
| 34 | C | -4.899957 | -1.193065 | -3.686863 |
| 35 | H | -4.676229 | -2.032183 | -4.326978 |
| 36 | H | -5.899529 | -0.807525 | -3.573455 |
| 37 | N | -1.439332 | -1.512939 | 1.699729  |
| 38 | O | -0.764324 | -0.538672 | 1.437213  |
| 39 | O | -1.362366 | -2.209854 | 2.694969  |

E = -1664.892860 Hartree/particle; ZPE = 0.259404 Hartree/particle  
Number of imaginary frequencies at the B3LYP/6-311++G(d,p) level = 0

**Table S9.** Mulliken atomic charges for optimized structure of **BNMTNIW, 1** obtained using the B3LYP/6-311++G(d,p) level of theory

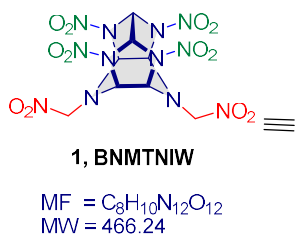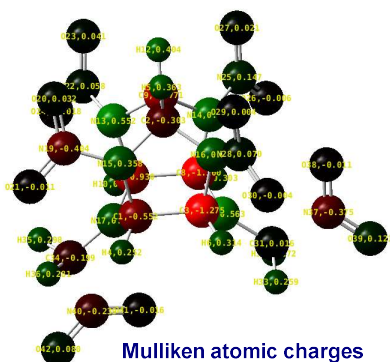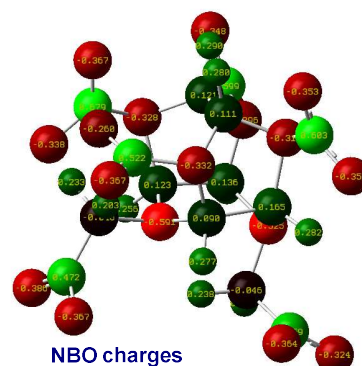

| Center Number | Atomic Symbol | Mulliken Atomic Charges |
|---------------|---------------|-------------------------|
| 1             | C             | -0.551891               |
| 2             | C             | -0.302566               |
| 3             | C             | -1.274929               |
| 4             | H             | 0.251839                |
| 5             | H             | 0.362872                |
| 6             | H             | 0.314395                |
| 7             | C             | -0.930331               |
| 8             | C             | -1.100398               |
| 9             | C             | -0.770593               |
| 10            | H             | 0.299896                |
| 11            | H             | 0.303298                |
| 12            | H             | 0.404485                |
| 13            | N             | 0.551632                |
| 14            | N             | 0.442146                |
| 15            | N             | 0.358007                |
| 16            | N             | 0.352505                |
| 17            | N             | 0.309869                |
| 18            | N             | 0.563317                |
| 19            | N             | -0.403851               |
| 20            | O             | 0.031596                |
| 21            | O             | -0.010884               |
| 22            | N             | 0.057770                |
| 23            | O             | 0.040961                |
| 24            | O             | -0.018488               |
| 25            | N             | 0.147411                |
| 26            | O             | -0.006138               |
| 27            | O             | 0.021424                |
| 28            | N             | 0.069675                |
| 29            | O             | 0.003775                |
| 30            | O             | -0.003971               |
| 31            | C             | 0.015875                |
| 32            | H             | 0.272193                |
| 33            | H             | 0.259258                |
| 34            | C             | -0.199242               |
| 35            | H             | 0.297631                |

|    |   |           |
|----|---|-----------|
| 36 | H | 0.280593  |
| 37 | N | -0.374644 |
| 38 | O | -0.010554 |
| 39 | O | 0.120598  |
| 40 | N | -0.239381 |
| 41 | O | -0.015570 |
| 42 | O | 0.080411  |

Sum of Mulliken charges= 0.00000

**Table S10.** Cartesian coordinates (in Å) for optimized structure of **BNIMTNIW**, **2** obtained using the B3LYP/6-311++G(d,p) level of theory

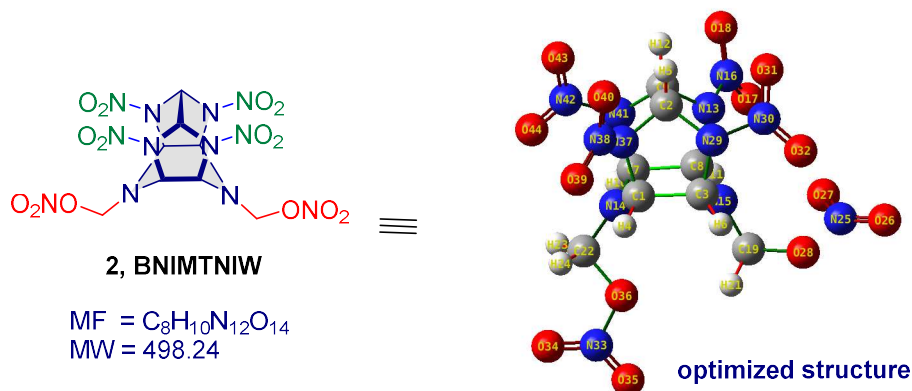

| Center Number | Atomic Symbol | Coordinates (Angstroms) |           |           |
|---------------|---------------|-------------------------|-----------|-----------|
|               |               | X                       | Y         | Z         |
| 1             | C             | -3.818457               | 0.552629  | -1.907482 |
| 2             | C             | -1.781458               | 1.747003  | -1.628291 |
| 3             | C             | -3.178565               | 0.135408  | -0.512550 |
| 4             | H             | -4.866047               | 0.816714  | -1.805834 |
| 5             | H             | -1.356078               | 2.740199  | -1.547572 |
| 6             | H             | -3.914292               | 0.142786  | 0.287835  |
| 7             | C             | -2.311673               | -0.967935 | -3.056265 |
| 8             | C             | -1.638233               | -1.335707 | -1.663263 |
| 9             | C             | -0.780045               | 0.763014  | -2.389087 |
| 10            | H             | -2.311130               | -1.813108 | -3.739536 |
| 11            | H             | -1.243834               | -2.346539 | -1.660140 |
| 12            | H             | 0.125444                | 1.284878  | -2.674676 |
| 13            | N             | -0.493890               | -0.384113 | -1.538041 |
| 14            | N             | -3.660486               | -0.491574 | -2.879271 |
| 15            | N             | -2.561709               | -1.162372 | -0.581918 |
| 16            | N             | 0.821426                | -0.951284 | -1.716941 |
| 17            | O             | 0.928875                | -2.138644 | -1.496003 |
| 18            | O             | 1.701989                | -0.172649 | -2.012116 |
| 19            | C             | -3.141558               | -2.280458 | 0.103725  |
| 20            | H             | -2.763941               | -3.205276 | -0.328261 |
| 21            | H             | -4.232017               | -2.279489 | 0.056017  |
| 22            | C             | -4.758562               | -1.119127 | -3.490222 |
| 23            | H             | -4.486064               | -1.564112 | -4.445127 |
| 24            | H             | -5.599159               | -0.438433 | -3.615809 |



|    |   |           |           |           |
|----|---|-----------|-----------|-----------|
| 25 | N | -1.591121 | -2.636965 | 1.935166  |
| 26 | O | -1.429556 | -2.538336 | 3.111522  |
| 27 | O | -0.836008 | -2.997976 | 1.065641  |
| 28 | O | -2.925423 | -2.272729 | 1.527924  |
| 29 | N | -2.215823 | 1.237598  | -0.324253 |
| 30 | N | -1.325519 | 1.233935  | 0.748628  |
| 31 | O | -0.312317 | 1.898343  | 0.606849  |
| 32 | O | -1.671007 | 0.606238  | 1.731354  |
| 33 | N | -6.296616 | -2.981413 | -3.028009 |
| 34 | O | -6.768463 | -2.674062 | -4.096458 |
| 35 | O | -6.612630 | -3.849451 | -2.265263 |
| 36 | O | -5.188087 | -2.214769 | -2.568404 |
| 37 | N | -3.056179 | 1.761093  | -2.331692 |
| 38 | N | -3.771759 | 2.999840  | -2.330836 |
| 39 | O | -4.972427 | 2.917409  | -2.512064 |
| 40 | O | -3.113301 | 4.010128  | -2.215860 |
| 41 | N | -1.395032 | 0.079629  | -3.536065 |
| 42 | N | -1.682567 | 0.774870  | -4.703794 |
| 43 | O | -1.156282 | 1.867029  | -4.830358 |
| 44 | O | -2.402884 | 0.202029  | -5.505875 |

E = -2020.497774 Hartree/particle; ZPE = 0.285121 Hartree/particle.

Number of imaginary frequencies at the B3LYP/6-311++G(d,p) level = 0

**Table S11.** Cartesian coordinates (in Å) for optimized structure of **BNIMTNIW**, **2A** obtained using the B3LYP/6-311++G(d,p) level of theory

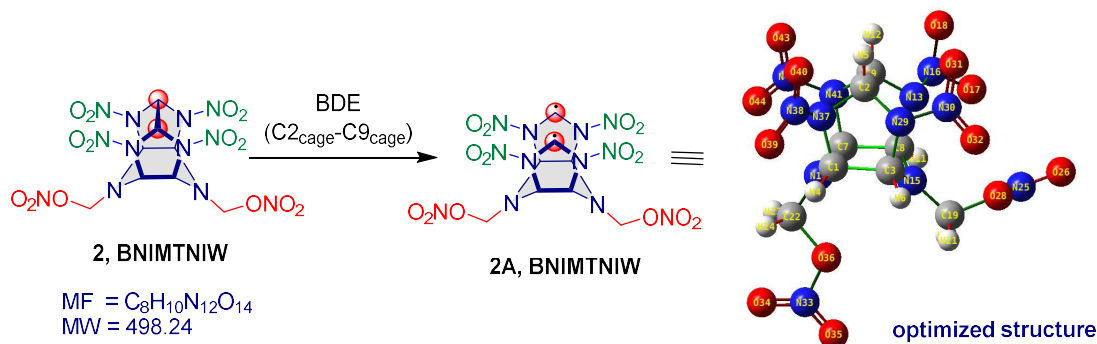

| Center Number | Atomic Symbol | Coordinates (Angstroms) |             |             |
|---------------|---------------|-------------------------|-------------|-------------|
|               |               | X                       | Y           | Z           |
| 1             | C             | -3.75083551             | -0.02595024 | -1.22986563 |
| 2             | C             | -2.20302538             | 1.49381656  | -1.93270166 |
| 3             | C             | -2.69911699             | 0.13747807  | -0.11846956 |
| 4             | H             | -4.71935148             | -0.28296182 | -0.85460323 |
| 5             | H             | -2.11620150             | 2.43235165  | -2.43917330 |
| 6             | H             | -3.10361584             | 0.35354058  | 0.84827636  |
| 7             | C             | -2.13504736             | -1.40820896 | -2.59991018 |
| 8             | C             | -1.19031607             | -1.35816733 | -1.37230998 |
| 9             | C             | -1.08665324             | 0.61596235  | -2.55502118 |
| 10            | H             | -2.26392844             | -2.38268708 | -3.02261821 |
| 11            | H             | -0.54239434             | -2.20758590 | -1.31243096 |

|    |   |             |             |             |
|----|---|-------------|-------------|-------------|
| 12 | H | -0.38796051 | 1.33095170  | -2.93649031 |
| 13 | N | -0.37878918 | -0.24068417 | -1.63467873 |
| 14 | N | -3.44147902 | -1.08077775 | -2.13697838 |
| 15 | N | -1.94300227 | -1.18165912 | -0.08499053 |
| 16 | N | 0.75005292  | -0.67567353 | -2.33930615 |
| 17 | O | 1.21672221  | -1.80187812 | -2.12591262 |
| 18 | O | 1.28128005  | 0.06600049  | -3.17559031 |
| 19 | C | -2.87960540 | -2.29580457 | 0.12081159  |
| 20 | H | -2.33657864 | -3.21726995 | 0.15120053  |
| 21 | H | -3.58376755 | -2.32316748 | -0.68436352 |
| 22 | C | -4.31013681 | -0.91944399 | -3.31184222 |
| 23 | H | -3.71482609 | -0.93763931 | -4.20075959 |
| 24 | H | -4.82685347 | 0.01532310  | -3.24769905 |
| 25 | N | -2.68036373 | -2.07679389 | 2.37987567  |
| 26 | O | -2.92556743 | -1.41118578 | 3.39402298  |
| 27 | O | -1.62070106 | -2.71075300 | 2.29702245  |
| 28 | O | -3.57537356 | -2.11157289 | 1.35647552  |
| 29 | N | -1.94634635 | 1.43707227  | -0.51737050 |
| 30 | N | -0.60534212 | 1.48237267  | -0.11780135 |
| 31 | O | 0.22176235  | 2.10483477  | -0.79610281 |
| 32 | O | -0.24699884 | 0.89995619  | 0.91371930  |
| 33 | N | -6.06385075 | -1.83819019 | -4.43941754 |
| 34 | O | -5.62829725 | -1.29124696 | -5.46059335 |
| 35 | O | -7.23073135 | -2.24930581 | -4.40736523 |
| 36 | O | -5.26019458 | -1.98745134 | -3.35246866 |
| 37 | N | -3.67122097 | 1.17903319  | -1.91105863 |
| 38 | N | -4.33637423 | 2.19678957  | -1.21698150 |
| 39 | O | -5.34382242 | 1.93344828  | -0.54813677 |
| 40 | O | -3.91692147 | 3.35982750  | -1.27226197 |
| 41 | N | -1.52811557 | -0.40054804 | -3.54645195 |
| 42 | N | -2.22458818 | -0.00986694 | -4.48459809 |
| 43 | O | -2.44890678 | 1.16460776  | -4.57792100 |
| 44 | O | -2.64507912 | -0.82264345 | -5.25983386 |

E = -2020.398120 Hartree/particle; ZPE = 0.281786 Hartree/particle

Number of imaginary frequencies at the B3LYP/6-311++G(d,p) level = 0

**Table S12.** Cartesian coordinates (in Å) for optimized structure of **BNIMTNIW**, **2B** obtained using the B3LYP/6-311++G(d,p) level of theory

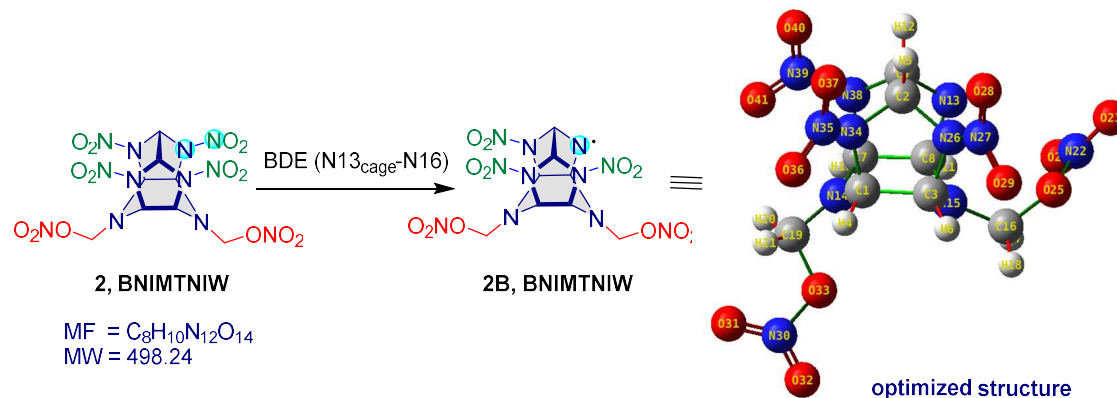

| Center<br>Number | Atomic<br>Symbol | Coordinates (Angstroms) |           |           |
|------------------|------------------|-------------------------|-----------|-----------|
|                  |                  | X                       | Y         | Z         |
| 1                | C                | -3.829683               | 0.420060  | -1.865123 |
| 2                | C                | -1.710245               | 1.395972  | -1.381676 |
| 3                | C                | -3.332613               | -0.062599 | -0.437436 |
| 4                | H                | -4.848407               | 0.792519  | -1.820898 |
| 5                | H                | -1.185187               | 2.334291  | -1.244099 |
| 6                | H                | -4.109105               | 0.056276  | 0.313099  |
| 7                | C                | -2.425940               | -1.242349 | -2.920750 |
| 8                | C                | -1.893013               | -1.684630 | -1.508053 |
| 9                | C                | -0.771300               | 0.282825  | -2.061878 |
| 10               | H                | -2.456419               | -2.066307 | -3.628280 |
| 11               | H                | -1.622554               | -2.739104 | -1.487309 |
| 12               | H                | 0.209559                | 0.705863  | -2.262877 |
| 13               | N                | -0.691396               | -0.881205 | -1.204483 |
| 14               | N                | -3.719653               | -0.620433 | -2.841821 |
| 15               | N                | -2.916891               | -1.441619 | -0.499681 |
| 16               | C                | -2.879359               | -2.189064 | 0.718494  |
| 17               | H                | -2.734662               | -3.245351 | 0.503295  |
| 18               | H                | -3.810166               | -2.036435 | 1.264297  |
| 19               | C                | -4.781974               | -0.969296 | -3.696004 |
| 20               | H                | -4.420671               | -1.376137 | -4.638021 |
| 21               | H                | -5.450110               | -0.129476 | -3.882177 |
| 22               | N                | -0.594330               | -2.392627 | 1.580602  |
| 23               | O                | 0.215007                | -1.894904 | 2.300441  |
| 24               | O                | -0.496166               | -3.329838 | 0.826387  |
| 25               | O                | -1.882398               | -1.755706 | 1.685083  |
| 26               | N                | -2.214791               | 0.857164  | -0.117139 |
| 27               | N                | -2.353400               | 1.744533  | 0.977231  |
| 28               | O                | -1.580052               | 2.681181  | 1.013113  |
| 29               | O                | -3.192187               | 1.448919  | 1.810100  |
| 30               | N                | -6.687854               | -2.500450 | -3.711087 |
| 31               | O                | -6.893102               | -2.011534 | -4.798569 |
| 32               | O                | -7.300297               | -3.346277 | -3.122660 |
| 33               | O                | -5.560218               | -2.028179 | -2.992950 |
| 34               | N                | -2.915100               | 1.546759  | -2.193591 |
| 35               | N                | -3.470537               | 2.845279  | -2.343320 |
| 36               | O                | -4.653214               | 2.888101  | -2.635567 |
| 37               | O                | -2.706999               | 3.780215  | -2.228010 |
| 38               | N                | -1.352964               | -0.293872 | -3.277977 |
| 39               | N                | -1.415623               | 0.426548  | -4.456098 |
| 40               | O                | -0.733083               | 1.436364  | -4.518755 |
| 41               | O                | -2.123422               | -0.039677 | -5.337719 |

E = -1815.318111 Hartree/particle; ZPE = 0.269774 Hartree/particle  
Number of imaginary frequencies at the B3LYP/6-311++G(d,p) level = 0

**Table S13.** Cartesian coordinates (in Å) for optimized structure of **BNIMTNIW**, **2C** obtained using the B3LYP/6-311++G(d,p) level of theory

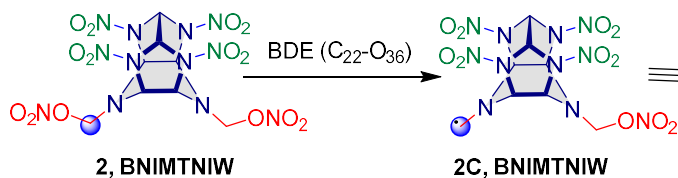

MF = C<sub>8</sub>H<sub>10</sub>N<sub>12</sub>O<sub>14</sub>  
MW = 498.24

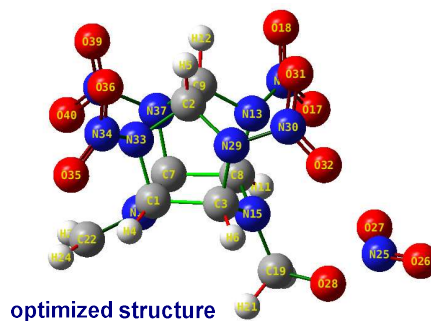

| Center Number | Atomic Symbol | Coordinates (Angstroms) |           |           |
|---------------|---------------|-------------------------|-----------|-----------|
|               |               | X                       | Y         | Z         |
| 1             | C             | -3.905937               | 0.259024  | -1.578160 |
| 2             | C             | -1.968645               | 1.632857  | -1.705719 |
| 3             | C             | -3.060670               | 0.051337  | -0.258019 |
| 4             | H             | -4.951389               | 0.457958  | -1.365302 |
| 5             | H             | -1.627805               | 2.658682  | -1.778109 |
| 6             | H             | -3.684113               | 0.089002  | 0.632121  |
| 7             | C             | -2.436461               | -1.249237 | -2.776556 |
| 8             | C             | -1.560235               | -1.413979 | -1.461528 |
| 9             | C             | -0.986483               | 0.652839  | -2.491324 |
| 10            | H             | -2.448883               | -2.153309 | -3.379680 |
| 11            | H             | -1.081678               | -2.387289 | -1.419239 |
| 12            | H             | -0.171647               | 1.207220  | -2.941188 |
| 13            | N             | -0.500154               | -0.372978 | -1.576715 |
| 14            | N             | -3.792432               | -0.898289 | -2.422557 |
| 15            | N             | -2.333073               | -1.193662 | -0.272943 |
| 16            | N             | 0.828250                | -0.853492 | -1.856569 |
| 17            | O             | 1.068712                | -1.994277 | -1.519883 |
| 18            | O             | 1.595531                | -0.052214 | -2.345227 |
| 19            | C             | -2.809570               | -2.294981 | 0.510667  |
| 20            | H             | -2.390598               | -3.223298 | 0.125516  |
| 21            | H             | -3.900304               | -2.368217 | 0.530451  |
| 22            | C             | -4.859304               | -1.247532 | -3.256691 |
| 23            | H             | -4.656423               | -1.848248 | -4.126802 |
| 24            | H             | -5.798756               | -0.738388 | -3.115510 |
| 25            | N             | -1.135443               | -2.402237 | 2.261971  |
| 26            | O             | -0.907528               | -2.162988 | 3.406364  |
| 27            | O             | -0.419386               | -2.817501 | 1.385754  |
| 28            | O             | -2.519551               | -2.162180 | 1.913703  |
| 29            | N             | -2.186960               | 1.235055  | -0.310628 |
| 30            | N             | -1.180326               | 1.418985  | 0.633931  |
| 31            | O             | -0.254433               | 2.139166  | 0.298303  |
| 32            | O             | -1.348781               | 0.880156  | 1.711714  |
| 33            | N             | -3.318047               | 1.473809  | -2.231036 |
| 34            | N             | -4.132086               | 2.653931  | -2.236101 |
| 35            | O             | -5.334119               | 2.467685  | -2.236559 |
| 36            | O             | -3.553950               | 3.717182  | -2.304028 |
| 37            | N             | -1.672334               | -0.190130 | -3.472302 |

|    |   |           |           |           |
|----|---|-----------|-----------|-----------|
| 38 | N | -2.065978 | 0.322700  | -4.698729 |
| 39 | O | -1.659260 | 1.440034  | -4.974708 |
| 40 | O | -2.739141 | -0.412749 | -5.401510 |

E = -1740.094171 Hartree/particle; ZPE = 0.263456 Hartree/particle

Number of imaginary frequencies at the B3LYP/6-311++G(d,p) level = 0

**Table S14.** Mulliken atomic charges for optimized structure of **BNMTNIW**, **2** obtained using the B3LYP/6-311++G(d,p) level of theory

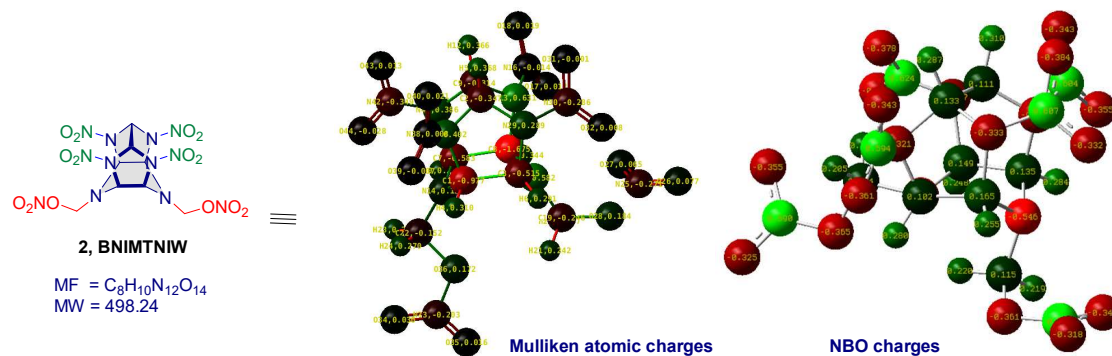

| Center Number | Atomic Symbol | Mulliken Atomic Charges |
|---------------|---------------|-------------------------|
| 1             | C             | -0.976717               |
| 2             | C             | -0.346525               |
| 3             | C             | -0.514584               |
| 4             | H             | 0.310365                |
| 5             | H             | 0.368072                |
| 6             | H             | 0.290795                |
| 7             | C             | -0.582629               |
| 8             | C             | -1.674598               |
| 9             | C             | -0.313984               |
| 10            | H             | 0.247941                |
| 11            | H             | 0.343848                |
| 12            | H             | 0.366412                |
| 13            | N             | 0.631282                |
| 14            | N             | 0.135211                |
| 15            | N             | 0.582271                |
| 16            | N             | -0.013568               |
| 17            | O             | 0.012272                |
| 18            | O             | 0.018824                |
| 19            | C             | -0.245616               |
| 20            | H             | 0.207202                |
| 21            | H             | 0.241702                |
| 22            | C             | -0.152468               |
| 23            | H             | 0.269544                |
| 24            | H             | 0.270488                |
| 25            | N             | -0.271191               |
| 26            | O             | 0.076969                |
| 27            | O             | 0.064771                |

|    |   |           |
|----|---|-----------|
| 28 | O | 0.183991  |
| 29 | N | 0.289277  |
| 30 | N | -0.286322 |
| 31 | O | -0.000848 |
| 32 | O | 0.008343  |
| 33 | N | -0.202737 |
| 34 | O | 0.030096  |
| 35 | O | 0.015877  |
| 36 | O | 0.172335  |
| 37 | N | 0.401610  |
| 38 | N | 0.007813  |
| 39 | O | -0.007439 |
| 40 | O | 0.020513  |
| 41 | N | 0.385639  |
| 42 | N | -0.349113 |
| 43 | O | 0.012887  |
| 44 | O | -0.028012 |

Sum of Mulliken charges= 0.00000

**Table S15.** Comparison of selected bond lengths for optimized structure of **BNMTNIW, 1** and **BNIMTNIW, 2** obtained using the B3LYP/6-311++G(d,p) level of theory

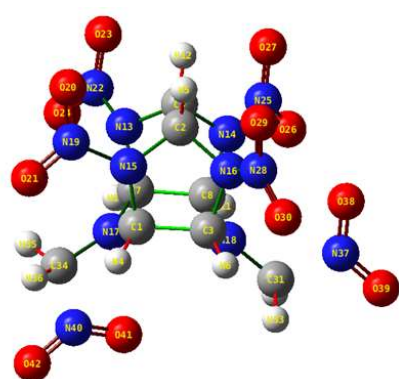

**1, BNMTNIW**  
optimized structure

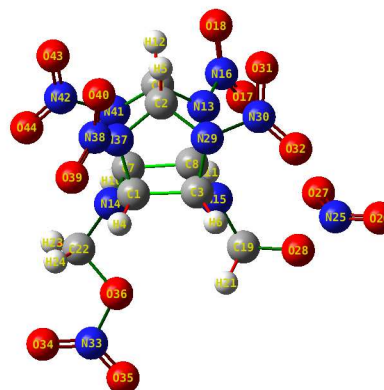

**2, BNIMTNIW**  
optimized structure

| Atom      | Atom      | Bond Lengths (Å)<br>BNMTNIW, 1 | Atom      | Atom      | Bond Lengths (Å)<br>BNIMTNIW, 2 |
|-----------|-----------|--------------------------------|-----------|-----------|---------------------------------|
| C1        | C3        | 1.5897                         | C1        | C3        | 1.5904                          |
| C1        | H4        | 1.0868                         | C1        | H4        | 1.0851                          |
| C1        | N15       | 1.4837                         | C1        | N14       | 1.4352                          |
| C1        | N17       | 1.4341                         | C1        | N37       | 1.4904                          |
| C2        | H5        | 1.0839                         | C2        | H5        | 1.0835                          |
| <b>C2</b> | <b>C9</b> | <b>1.6034</b>                  | <b>C2</b> | <b>C9</b> | <b>1.5968</b>                   |
| C2        | N15       | 1.4692                         | C2        | N29       | 1.4658                          |
| C2        | N16       | 1.4516                         | C2        | N37       | 1.4560                          |
| C3        | H6        | 1.0858                         | C3        | H6        | 1.0872                          |
| C3        | N16       | 1.4897                         | C3        | N15       | 1.4386                          |
| C3        | N18       | 1.4326                         | C3        | N29       | 1.4755                          |

|            |            |               |            |            |               |
|------------|------------|---------------|------------|------------|---------------|
| C7         | C8         | 1.5899        | C7         | C8         | 1.5904        |
| C7         | H10        | 1.0851        | C7         | H10        | 1.0868        |
| C7         | N13        | 1.4890        | C7         | N14        | 1.4414        |
| C7         | N17        | 1.4321        | C7         | N41        | 1.4724        |
| C8         | H11        | 1.0862        | C8         | H11        | 1.0851        |
| C8         | N14        | 1.4736        | C8         | H13        | 1.4936        |
| C8         | N18        | 1.4382        | C8         | N15        | 1.4325        |
| C9         | H12        | 1.0846        | C9         | H12        | 1.0834        |
| C9         | N13        | 1.4648        | C9         | N13        | 1.4567        |
| C9         | N14        | 1.4550        | C9         | N41        | 1.4700        |
| N13        | N22        | 1.4239        | <b>N13</b> | <b>N16</b> | <b>1.4435</b> |
| N14        | N25        | 1.4041        | N14        | C22        | 1.4046        |
| <b>N15</b> | <b>N19</b> | <b>1.3857</b> | N15        | C19        | 1.4340        |
| N16        | N28        | 1.4185        | N16        | O17        | 1.2125        |
| N17        | C34        | 1.4079        | N16        | O18        | 1.2119        |
| N18        | C31        | 1.4096        | C19        | H20        | 1.0883        |
| N19        | O20        | 1.2183        | C19        | H21        | 1.0915        |
| N19        | O21        | 1.2230        | C19        | O28        | 1.4405        |
| N22        | O23        | 1.2119        | C22        | H23        | 1.0882        |
| N22        | O24        | 1.2187        | C22        | H24        | 1.0889        |
| N25        | O26        | 1.2191        | <b>C22</b> | <b>O36</b> | <b>1.4949</b> |
| N25        | O27        | 1.2157        | N25        | O26        | 1.1915        |
| N28        | O29        | 1.2144        | N25        | O27        | 1.2069        |
| N28        | O30        | 1.2175        | N25        | O28        | 1.4418        |
| C31        | H32        | 1.0891        | N29        | N30        | 1.3942        |
| C31        | H33        | 1.0893        | N30        | N31        | 1.2199        |
| C31        | N37        | 1.5656        | N30        | O32        | 1.2162        |
| C34        | H35        | 1.0909        | N33        | O34        | 1.2078        |
| C34        | H36        | 1.0866        | N33        | O35        | 1.1980        |
| <b>C34</b> | <b>N40</b> | <b>1.5677</b> | N33        | O36        | 1.4240        |
| N37        | O38        | 1.2150        | N37        | N38        | 1.4306        |
| N37        | O39        | 1.2171        | N38        | O39        | 1.2171        |
| N40        | O41        | 1.2190        | N38        | O40        | 1.2114        |
| N40        | O42        | 1.2157        | N41        | N42        | 1.3891        |
| ----       | ----       | ----          | N42        | O43        | 1.2180        |
| ----       | ----       | ----          | N42        | O44        | 1.2208        |

**Table S16.** Comparison of selected bond angles for optimized structure of **BNMTNIW, 1** obtained using the B3LYP/6-311++G(d,p) level of theory

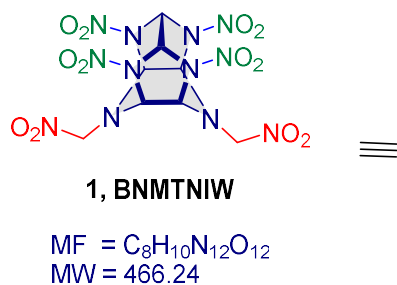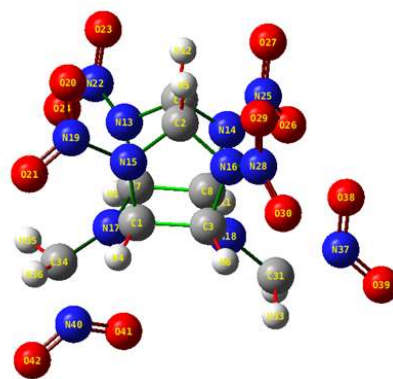

optimized structure

| Atom | Atom | Atom | Bond Angle (°) |
|------|------|------|----------------|
|      |      |      | BNMTNIW, 1     |
| C3   | C1   | H4   | 111.40         |
| C3   | C1   | N15  | 100.45         |
| C3   | C1   | N17  | 111.07         |
| H4   | C1   | N15  | 109.81         |
| H4   | C1   | N17  | 109.99         |
| N15  | C1   | N17  | 113.82         |
| H5   | C2   | C9   | 110.69         |
| H5   | C2   | N15  | 111.69         |
| H5   | C2   | N16  | 111.68         |
| C9   | C2   | N15  | 113.08         |
| C9   | C2   | N16  | 109.79         |
| N15  | C2   | N16  | 99.44          |
| C1   | C3   | H6   | 111.38         |
| C1   | C3   | N16  | 104.31         |
| C1   | C3   | N18  | 109.78         |
| H6   | C3   | N16  | 108.42         |
| H6   | C3   | N18  | 110.43         |
| N16  | C3   | N18  | 112.38         |
| C8   | C7   | H10  | 111.02         |
| C8   | C7   | N13  | 104.21         |
| C8   | C7   | N17  | 110.86         |
| H10  | C7   | N13  | 109.05         |
| H10  | C7   | N17  | 110.55         |
| N13  | C7   | N17  | 110.96         |
| C7   | C8   | H11  | 111.40         |
| C7   | C8   | N14  | 103.11         |
| C7   | C8   | N18  | 109.96         |
| H11  | C8   | N14  | 109.40         |
| H11  | C8   | N18  | 110.32         |
| N14  | C8   | N18  | 112.46         |
| C2   | C9   | H12  | 111.21         |
| C2   | C9   | N13  | 108.23         |
| C2   | C9   | N14  | 109.68         |
| H12  | C9   | N13  | 112.15         |
| H12  | C9   | N14  | 111.92         |



|     |     |     |        |
|-----|-----|-----|--------|
| N13 | C9  | N14 | 103.30 |
| C7  | N13 | C9  | 107.35 |
| C7  | N13 | N22 | 117.61 |
| C9  | N13 | N22 | 117.68 |
| C8  | N14 | C9  | 108.77 |
| C8  | N14 | N25 | 120.37 |
| C9  | N14 | N25 | 120.00 |
| C1  | N15 | C2  | 109.66 |
| C1  | N15 | N19 | 120.01 |
| C2  | N15 | N19 | 120.56 |
| C2  | N16 | C3  | 108.19 |
| C2  | N16 | N28 | 117.06 |
| C3  | N16 | N28 | 117.45 |
| C1  | N17 | C7  | 114.60 |
| C1  | N17 | C34 | 122.43 |
| C7  | N17 | C34 | 121.93 |
| C3  | N18 | C8  | 114.11 |
| C3  | N18 | C31 | 121.90 |
| C8  | N18 | C31 | 121.67 |
| N15 | N19 | O20 | 116.68 |
| N15 | N19 | O21 | 116.06 |
| N15 | N19 | H36 | 80.69  |
| O20 | N19 | O21 | 127.21 |
| O20 | N19 | H36 | 154.39 |
| O21 | N19 | H36 | 41.33  |
| N19 | O20 | N22 | 83.27  |
| N19 | O20 | O23 | 101.30 |
| N19 | O20 | O24 | 76.85  |
| O23 | O20 | O24 | 28.74  |
| N13 | N22 | O20 | 54.96  |
| N13 | N22 | O23 | 116.77 |
| N13 | N22 | O24 | 115.73 |
| O23 | N22 | O24 | 127.38 |
| O20 | O24 | H35 | 73.46  |
| N22 | O24 | H35 | 105.76 |
| N14 | N25 | O26 | 116.12 |
| N14 | N25 | O27 | 116.46 |
| O26 | N25 | O27 | 127.37 |
| N16 | N28 | O29 | 116.66 |
| N16 | N28 | O30 | 116.06 |
| O29 | N28 | O30 | 127.19 |
| N18 | C31 | H32 | 111.78 |
| N18 | C31 | H33 | 111.97 |
| N18 | C31 | N37 | 116.03 |
| H32 | C31 | H33 | 109.06 |
| H32 | C31 | N37 | 103.77 |
| H33 | C31 | N37 | 103.55 |
| N17 | C34 | H35 | 113.43 |
| N17 | C34 | H36 | 112.75 |
| N17 | C34 | N40 | 112.69 |

|     |     |     |        |
|-----|-----|-----|--------|
| H35 | C34 | H36 | 109.10 |
| H35 | C34 | N40 | 103.25 |
| H36 | C34 | N40 | 104.85 |
| O24 | H35 | C34 | 120.35 |
| N19 | H36 | C34 | 90.67  |
| C31 | N37 | O38 | 118.59 |
| C31 | N37 | O39 | 114.49 |
| O38 | N37 | O39 | 126.92 |
| C34 | N40 | O41 | 118.29 |
| C34 | N40 | O42 | 115.21 |
| O41 | N40 | O42 | 126.46 |

**Table S17.** Comparison of selected bond angles for optimized structure of **BNIMTNIW, 2** obtained using the B3LYP/6-311++G(d,p) level of theory

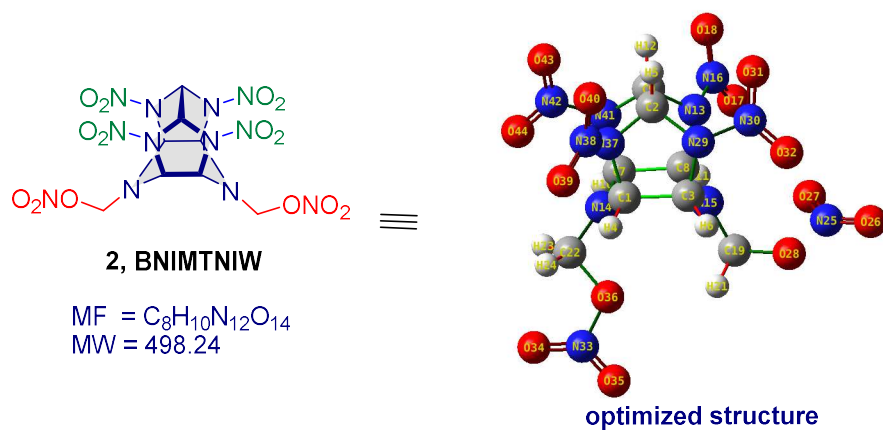

| Atom | Atom | Atom | Bond Angle (°)<br><b>BNIMTNIW, 2</b> |
|------|------|------|--------------------------------------|
| C3   | C1   | N14  | 111.0233                             |
| C3   | C1   | N37  | 104.8665                             |
| H4   | C1   | N14  | 110.2894                             |
| H4   | C1   | N37  | 108.8497                             |
| N14  | C1   | N37  | 109.9325                             |
| H5   | C2   | C9   | 110.7414                             |
| H5   | C2   | N29  | 111.631                              |
| H5   | C2   | N37  | 111.7683                             |
| C9   | C2   | N29  | 113.2996                             |
| C9   | C2   | N37  | 108.9559                             |
| N29  | C2   | N37  | 100.0038                             |
| C1   | C3   | H6   | 111.818                              |
| C1   | C3   | N15  | 111.5238                             |
| C1   | C3   | N29  | 100.2818                             |
| H6   | C3   | N15  | 109.3778                             |
| H6   | C3   | N29  | 110.0312                             |
| N15  | C3   | N29  | 113.5935                             |
| C8   | C7   | H10  | 111.7542                             |
| C8   | C7   | N14  | 111.4156                             |

|     |     |     |          |
|-----|-----|-----|----------|
| C8  | C7  | N41 | 100.7392 |
| H10 | C7  | N14 | 109.5529 |
| H10 | C7  | N41 | 110.3718 |
| N14 | C7  | N41 | 112.7969 |
| C7  | C8  | H11 | 111.8311 |
| C7  | C8  | H13 | 104.5096 |
| C7  | C8  | N15 | 111.1135 |
| H11 | C8  | N13 | 108.3495 |
| H11 | C8  | N15 | 110.1737 |
| H13 | C8  | N15 | 110.7037 |
| C2  | C9  | H12 | 110.6648 |
| C2  | C9  | N13 | 109.2744 |
| C2  | C9  | N41 | 113.3199 |
| H12 | C9  | N13 | 111.662  |
| H12 | C9  | N41 | 111.5869 |
| N13 | C9  | N41 | 99.9007  |
| C8  | N13 | C9  | 107.5917 |
| C8  | N13 | N16 | 115.9388 |
| C9  | N13 | N16 | 114.5816 |
| C1  | N14 | C7  | 115.2528 |
| C1  | N14 | C22 | 122.246  |
| C7  | N14 | C22 | 122.0397 |
| C3  | N15 | C8  | 114.959  |
| C3  | N15 | C19 | 120.4593 |
| C8  | N15 | C19 | 121.8184 |
| N13 | N16 | O17 | 116.2906 |
| N13 | N16 | O18 | 116.091  |
| O17 | N16 | O18 | 127.5272 |
| N15 | C19 | H20 | 109.4182 |
| N15 | C19 | H21 | 112.4807 |
| N15 | C19 | 28  | 114.0699 |
| H20 | C19 | O21 | 109.2711 |
| H20 | C19 | O28 | 110.1771 |
| H21 | C19 | O28 | 101.1339 |
| N14 | C22 | H23 | 111.6314 |
| N14 | C22 | H24 | 111.9858 |
| N14 | C22 | O36 | 106.4914 |
| H23 | C22 | H24 | 110.3488 |
| H23 | C22 | O36 | 108.2623 |
| H24 | C22 | O36 | 107.9072 |
| O26 | N25 | O27 | 130.6348 |
| O26 | N25 | O28 | 112.5467 |
| O27 | N25 | O28 | 116.8127 |
| C19 | O28 | N25 | 114.629  |
| C2  | N29 | C3  | 109.8409 |
| C2  | N29 | N30 | 119.7545 |
| C3  | N29 | N30 | 120.8577 |
| N29 | N30 | N31 | 116.0735 |
| N29 | N30 | O32 | 116.2169 |
| N31 | N30 | O32 | 127.6589 |

|     |     |     |          |
|-----|-----|-----|----------|
| O34 | N33 | O35 | 130.1351 |
| O34 | N33 | O36 | 116.9136 |
| O35 | N33 | O36 | 112.9513 |
| C22 | O36 | N33 | 114.7862 |
| C1  | N37 | C2  | 107.6032 |
| C1  | N37 | N38 | 116.4931 |
| C2  | N37 | N38 | 116.4887 |
| N37 | N38 | O39 | 115.768  |
| N37 | N38 | O40 | 116.7647 |
| O39 | N38 | O40 | 127.3623 |
| C7  | N41 | C9  | 109.692  |
| C7  | N41 | N42 | 120.0772 |
| C9  | N41 | N42 | 120.6535 |
| N41 | N42 | O43 | 116.5099 |
| N41 | N42 | O44 | 116.0778 |
| O43 | N42 | O44 | 127.3706 |

---

## References

- 1 M. J. Frisch, G. W. Trucks, H. B. Schlegel, G. E. Scuseria, M. A. Robb, J. R. Cheeseman, G. Scalmani, V. Barone, B. Mennucci, G. A. Petersson, H. Nakatsuji, M. L. Caricato, X. H. P. Hratchian, A. F. Izmaylov, J. Bloino, G. Zheng, J. L. Sonnenberg, M. Hada, M. Ehara, K. Toyota, R. Fukuda, J. Hasegawa, M. Ishida, T. Nakajima, Y. Honda, O. Kitao, H. Nakai, T. Vreven, J. A. Montgomery, Jr. J. E. Peralta, F. Ogliaro, M. Bearpark, J. J. Heyd, E. Brothers, K. N. Kudin, V. N. Staroverov, R. Kobayashi, J. Normand, K. Raghavachari, A. Rendell, J. C. Burant, S. S. Iyengar, J. Tomasi, M. Cossi, N. Rega, N. J. Millam, M. Klene, J. E. Knox, J. B. Cross, V. Bakken, C. Adamo, J. Jaramillo, R. Gomperts, R. E. Stratmann, O. Yazyev, A. J. Austin, R. Cammi, C. Pomelli, J. W. Ochterski, R. L. Martin, K. Morokuma, V. G. Zakrzewski, G. A. Voth, P. Salvador, J. J. Dannenberg, S. Dapprich, A. D. Daniels, Ö. Farkas, J. B. Foresman, J. V. Ortiz, J. Cioslowski, D. J. Fox, Revision D.01 ed. Gaussian Inc. Wallingford CT, 2003.
- 2 Atkins, Physical Chemistry, Oxford University press: Oxford, 1982.
- 3 E. F. C. Byrd and B. M. Rice, *J. Phys. Chem. A.*, 2006, **110**, 1005-1013.
- 4 P. Politzer, P. Lane, J. S. Murray, *Cent. Eur. J. Energy Mater.*, 2013, **10**, 37-52.
- 5 M. Pospisil, P. Vavra, M. C. Concha, J. S. Murray, P. Politzer, *J. Mol. Model.*, 2010, **16**, 895-901.
